# Supplementary material for: Binding discrepancy of fluoride in quaternary ammonium and alkali salts by a tris(amide) receptor in solid and solution states
Source: Royal Society of Chemistry journal article supplement (doi:10.1039/c2ce25592h), 2012-01-01
Supplement: c2ce25592h.pdf [file c2ce25592h.pdf]

## Electronic Supporting Information

### Binding discrepancy of fluoride in quaternary ammonium and alkali salts by a tris(amide) receptor in solid and solution-states

Sandeep Kumar Dey, Barun Datta and Gopal Das\*

Department of Chemistry, Indian Institute of Technology Guwahati, Assam-781039, India

E-mail: [gdas@iitg.ernet.in](mailto:gdas@iitg.ernet.in)

#### Characterization of receptor L:

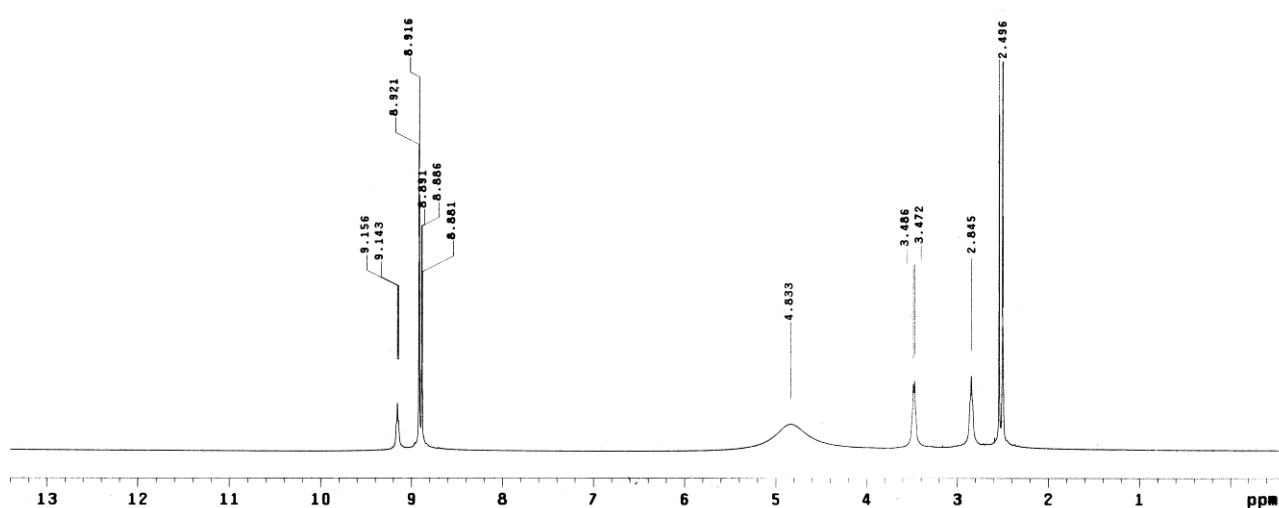

Figure S1. <sup>1</sup>H NMR spectrum of L in DMSO-*d*<sub>6</sub> at 298 K.

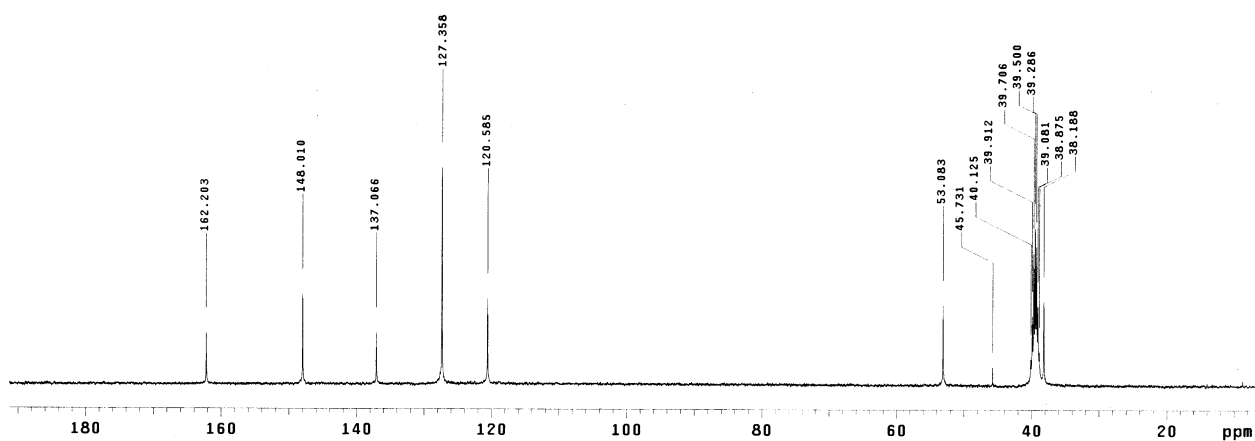

Figure S2. <sup>13</sup>C NMR spectrum of L in DMSO-*d*<sub>6</sub> at 298 K.

### Characterization of TBAF complex, **1d**:

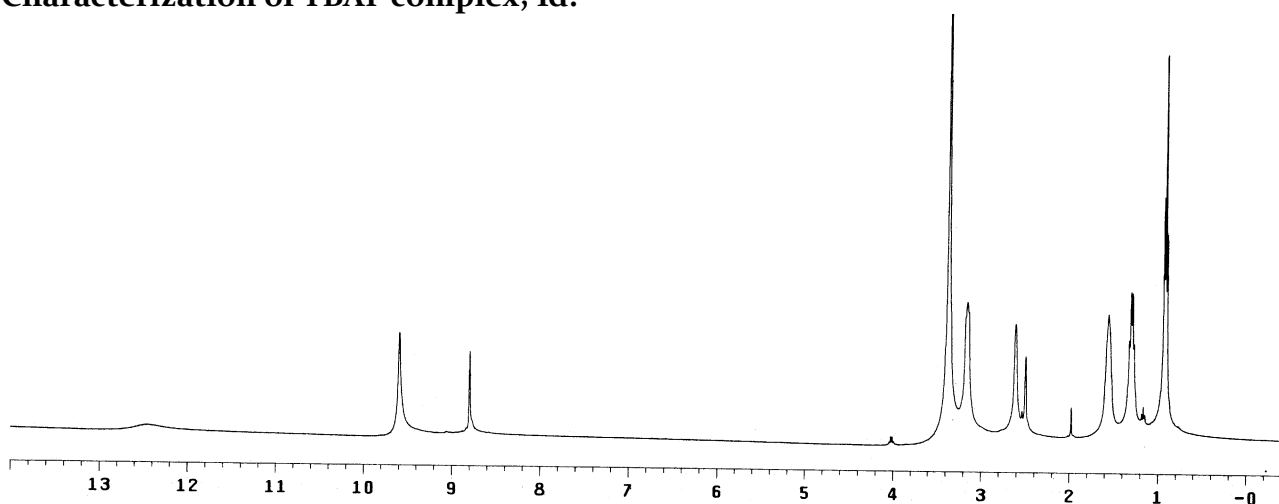

**Figure S3.** <sup>1</sup>H NMR spectrum of TBAF complex, **1d** in DMSO-*d*<sub>6</sub> at 298 K.

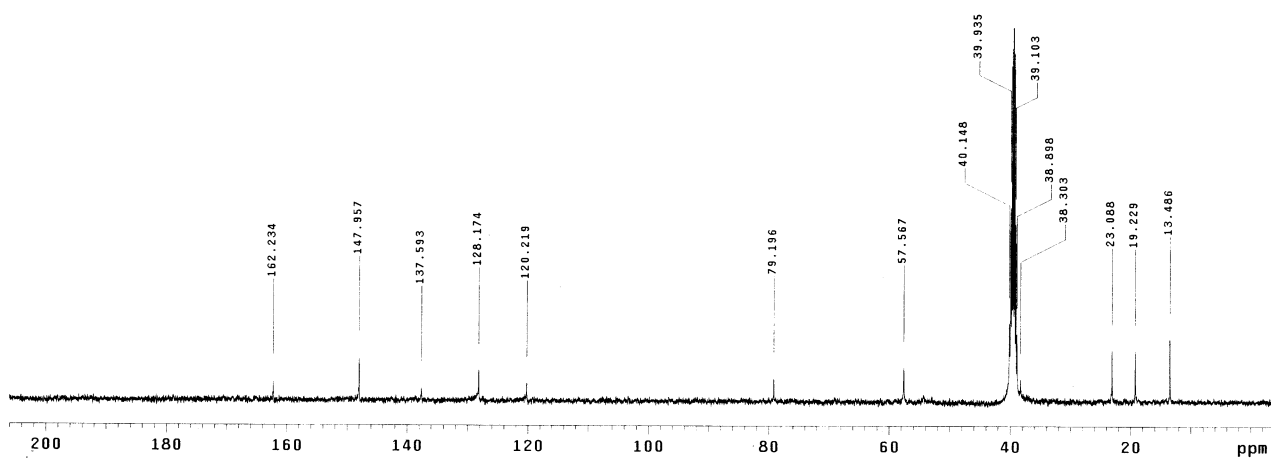

**Figure S4.** <sup>13</sup>C NMR spectrum of TBAF complex, **1d** in DMSO-*d*<sub>6</sub> at 298 K.

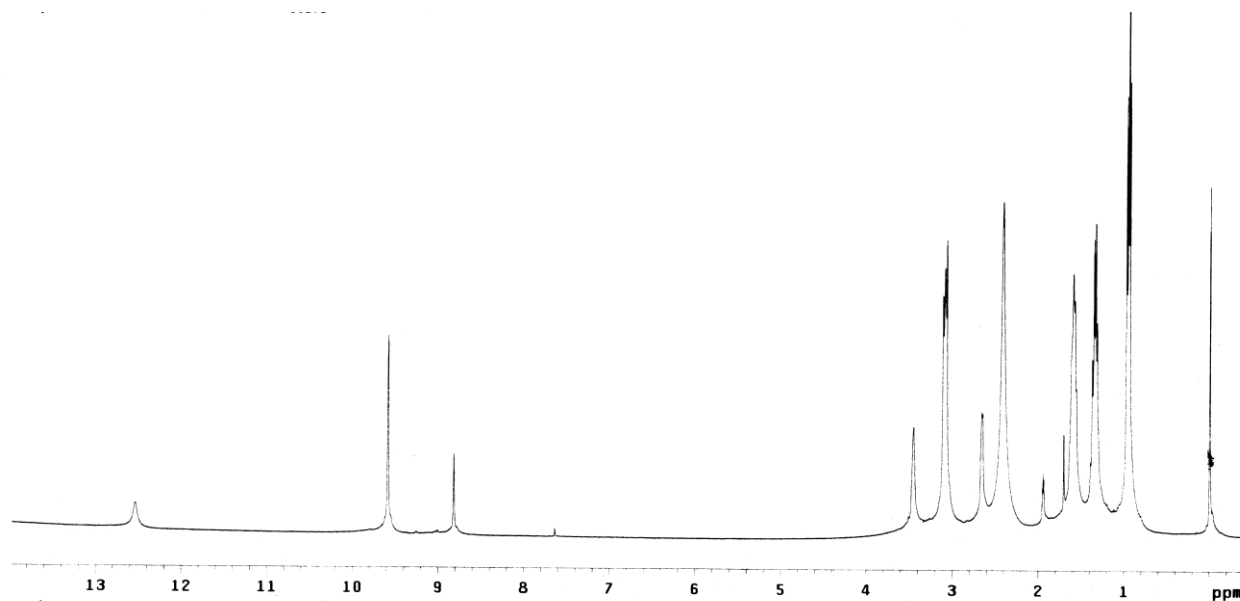

**Figure S5.** <sup>1</sup>H NMR spectrum of TBAF complex, **1d** in CD<sub>3</sub>CN at 298 K.

### Characterization of KF complex, **2**:

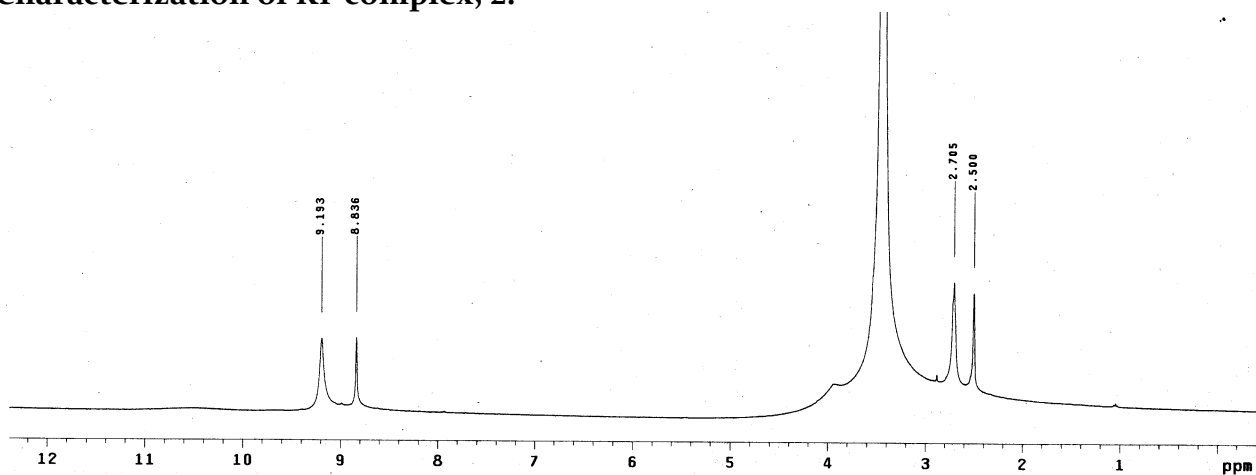

**Figure S6.** <sup>1</sup>H NMR spectrum of KF complex, **2** in DMSO-*d*<sub>6</sub> at 298 K.

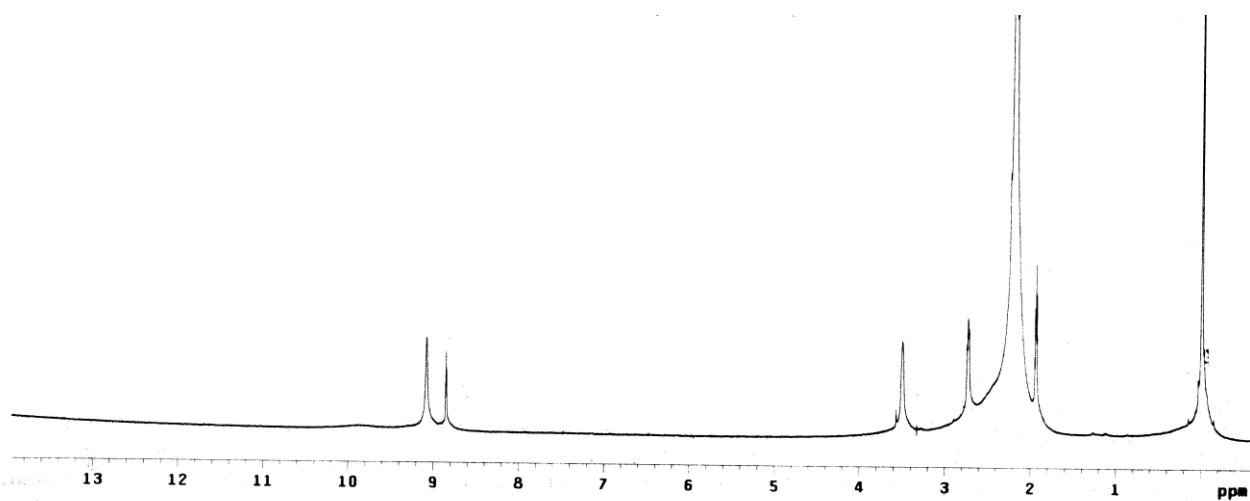

**Figure S7.** <sup>1</sup>H NMR spectrum of KF complex, **2** in CD<sub>3</sub>CN at 298 K.

### Additional Crystallographic data:

**Table S1.** Crystallographic parameters and refinement details of L-DMSO, L-DMF and complexes **1d** and **2**.

| Parameters                                                 | L-DMSO                                                            | L-DMF                                                           | Complex <b>1d</b>                                                | Complex <b>2</b>                                                  |
|------------------------------------------------------------|-------------------------------------------------------------------|-----------------------------------------------------------------|------------------------------------------------------------------|-------------------------------------------------------------------|
| Formula                                                    | C <sub>29</sub> H <sub>30</sub> N <sub>10</sub> O <sub>16</sub> S | C <sub>30</sub> H <sub>31</sub> N <sub>11</sub> O <sub>16</sub> | C <sub>46</sub> H <sub>60</sub> FN <sub>11</sub> O <sub>16</sub> | C <sub>27</sub> H <sub>24</sub> FKN <sub>10</sub> O <sub>17</sub> |
| <i>F</i> <sub>w</sub>                                      | 806.70                                                            | 801.66                                                          | 1042.05                                                          | 1858.21                                                           |
| Crystal system                                             | Triclinic                                                         | Monoclinic                                                      | Triclinic                                                        | Triclinic                                                         |
| Space group                                                | <i>P</i> -1                                                       | <i>P</i> <sub>2</sub> 1/ <i>c</i>                               | <i>P</i> -1                                                      | <i>P</i> -1                                                       |
| <i>a</i> /Å                                                | 11.2942(3)                                                        | 17.2139(6)                                                      | 10.1372(3)                                                       | 11.2710(12)                                                       |
| <i>b</i> /Å                                                | 12.4744(4)                                                        | 11.1890(3)                                                      | 16.4160(5)                                                       | 12.4543(13)                                                       |
| <i>c</i> /Å                                                | 12.8671(4)                                                        | 25.1968(7)                                                      | 17.3515(8)                                                       | 12.8718(14)                                                       |
| $\alpha$ /°                                                | 84.723(2)                                                         | 90.00                                                           | 109.413(2)                                                       | 84.825(6)                                                         |
| $\beta$ /°                                                 | 79.650(3)                                                         | 131.890(2)                                                      | 97.059(2)                                                        | 79.744(6)                                                         |
| $\gamma$ /°                                                | 88.404(2)                                                         | 90.00                                                           | 106.906(1)                                                       | 88.329(6)                                                         |
| <i>V</i> /Å <sup>3</sup>                                   | 1775.65(9)                                                        | 3612.8(2)                                                       | 2527.35(17)                                                      | 1770.6(3)                                                         |
| <i>Z</i>                                                   | 2                                                                 | 4                                                               | 2                                                                | 2                                                                 |
| <i>D</i> <sub>c</sub> /g cm <sup>-3</sup>                  | 1.509                                                             | 1.474                                                           | 1.369                                                            | 1.536                                                             |
| $\mu$ Mo <i>K</i> $\alpha$ /mm <sup>-1</sup>               | 0.180                                                             | 0.122                                                           | 0.107                                                            | 0.246                                                             |
| <i>T</i> /K                                                | 298(2)                                                            | 298(2)                                                          | 180(2)                                                           | 298(2)                                                            |
| $\theta$ max.                                              | 28.29                                                             | 28.390                                                          | 28.270                                                           | 27.140                                                            |
| Total no. of reflections                                   | 13679                                                             | 49295                                                           | 26140                                                            | 26731                                                             |
| Independent reflections                                    | 8734                                                              | 8991                                                            | 9814                                                             | 7784                                                              |
| Observed reflections                                       | 7605                                                              | 4777                                                            | 7233                                                             | 6870                                                              |
| Parameters refined                                         | 520                                                               | 516                                                             | 683                                                              | 505                                                               |
| <i>R</i> <sub>1</sub> , <i>I</i> > 2 $\sigma$ ( <i>I</i> ) | 0.0508                                                            | 0.0580                                                          | 0.0645                                                           | 0.0838                                                            |
| <i>wR</i> <sub>2</sub> (all data)                          | 0.1510                                                            | 0.2115                                                          | 0.2429                                                           | 0.2728                                                            |
| GOF ( <i>F</i> <sup>2</sup> )                              | 0.911                                                             | 1.023                                                           | 1.005                                                            | 1.035                                                             |

**Table S2.** Hydrogen bond interactions involved in the crystal structures of L-DMSO.

| L-DMSO                         | D-H...A     | <i>d</i> (H...A) | <i>d</i> (D...A) | <(D-H...A) |
|--------------------------------|-------------|------------------|------------------|------------|
| Intraligand interactions       | N8-H...O6   | 1.94(3)          | 2.891(3)         | 167(3)     |
|                                | C27-H...O6  | 2.46(2)          | 3.185(3)         | 134(2)     |
|                                | C1g...C2g   |                  | 3.756            |            |
| Interactions with lattice DMSO | N5-H...O16  | 1.98(3)          | 2.834(3)         | 157(2)     |
|                                | C14-H...O16 | 2.34(2)          | 3.239(3)         | 161(2)     |
|                                | O16...C2g   |                  | 3.532            |            |
| Interligand interactions       | N2-H...O11  | 1.98(3)          | 2.856(3)         | 134(2)     |
|                                | C1-H...O11  | 2.70(2)          | 3.427(3)         | 132(1)     |
|                                | C20-H...O2  | 2.65(2)          | 3.127(4)         | 110(2)     |
|                                | C19-H...O13 | 2.64(2)          | 3.309(3)         | 125(2)     |
|                                | C19-H...O15 | 2.66(2)          | 3.530(4)         | 148(2)     |
|                                | O8...C24    |                  | 3.169(3)         |            |
|                                | O5...C12    |                  | 3.023(3)         |            |
|                                | O12...N3    |                  | 2.987(3)         |            |
|                                | O12...O3    |                  | 3.007(3)         |            |

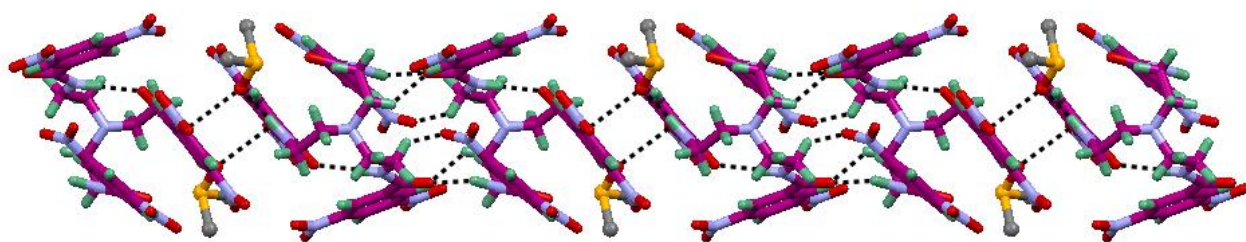

**Figure S8.** Solvent bridged 1D chain in L-DMSO diagonally along  $ac$ -axis.

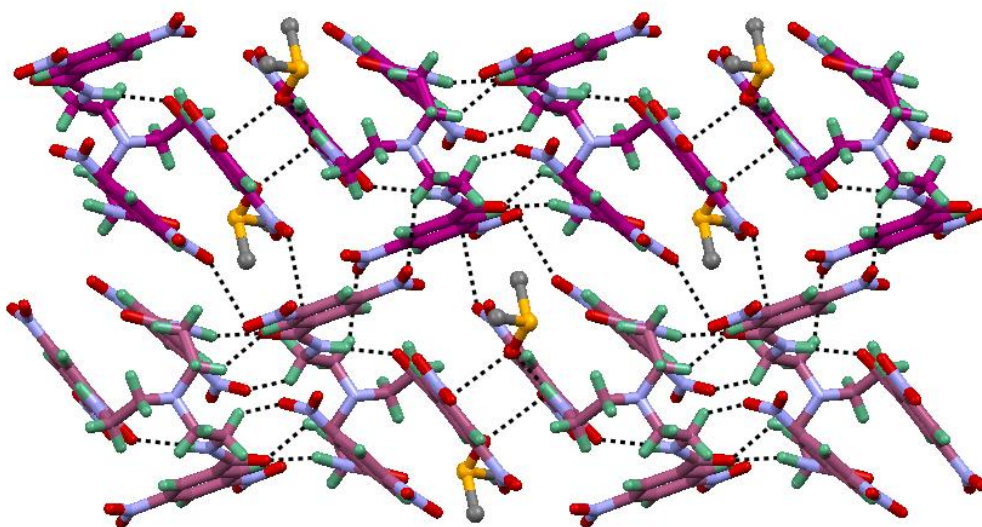

**Figure S9.** Crystal packing of L-DMSO as viewed down the  $a$ -axis showing the H-bonding and electron donor-acceptor interactions between two adjacent solvent-bridged 1D chains of receptor molecules.

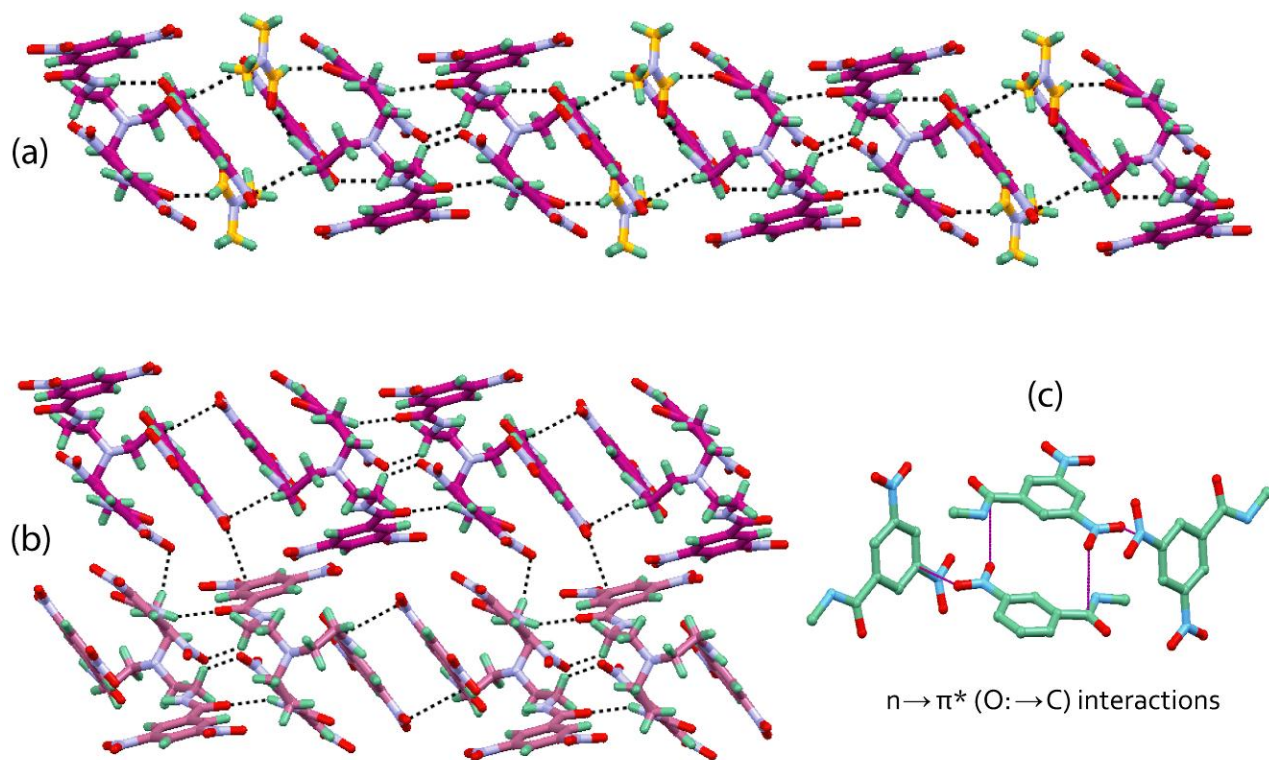

**Figure S10.** (a) Solvent bridged 1D chain of L-DMF along *c*-axis. (b) Crystal packing of L-DMF as viewed down the *b*-axis showing the intermolecular H-bonding and electron donor-acceptor interactions between two adjacent 1D chains of receptor molecules (Lattice DMF molecules are omitted for clarity). (c) Magnified view of the  $n \rightarrow \pi^*$  ( $O \rightarrow C$ ) electron donor-acceptor interactions between the adjacent receptor molecules in L-DMF.



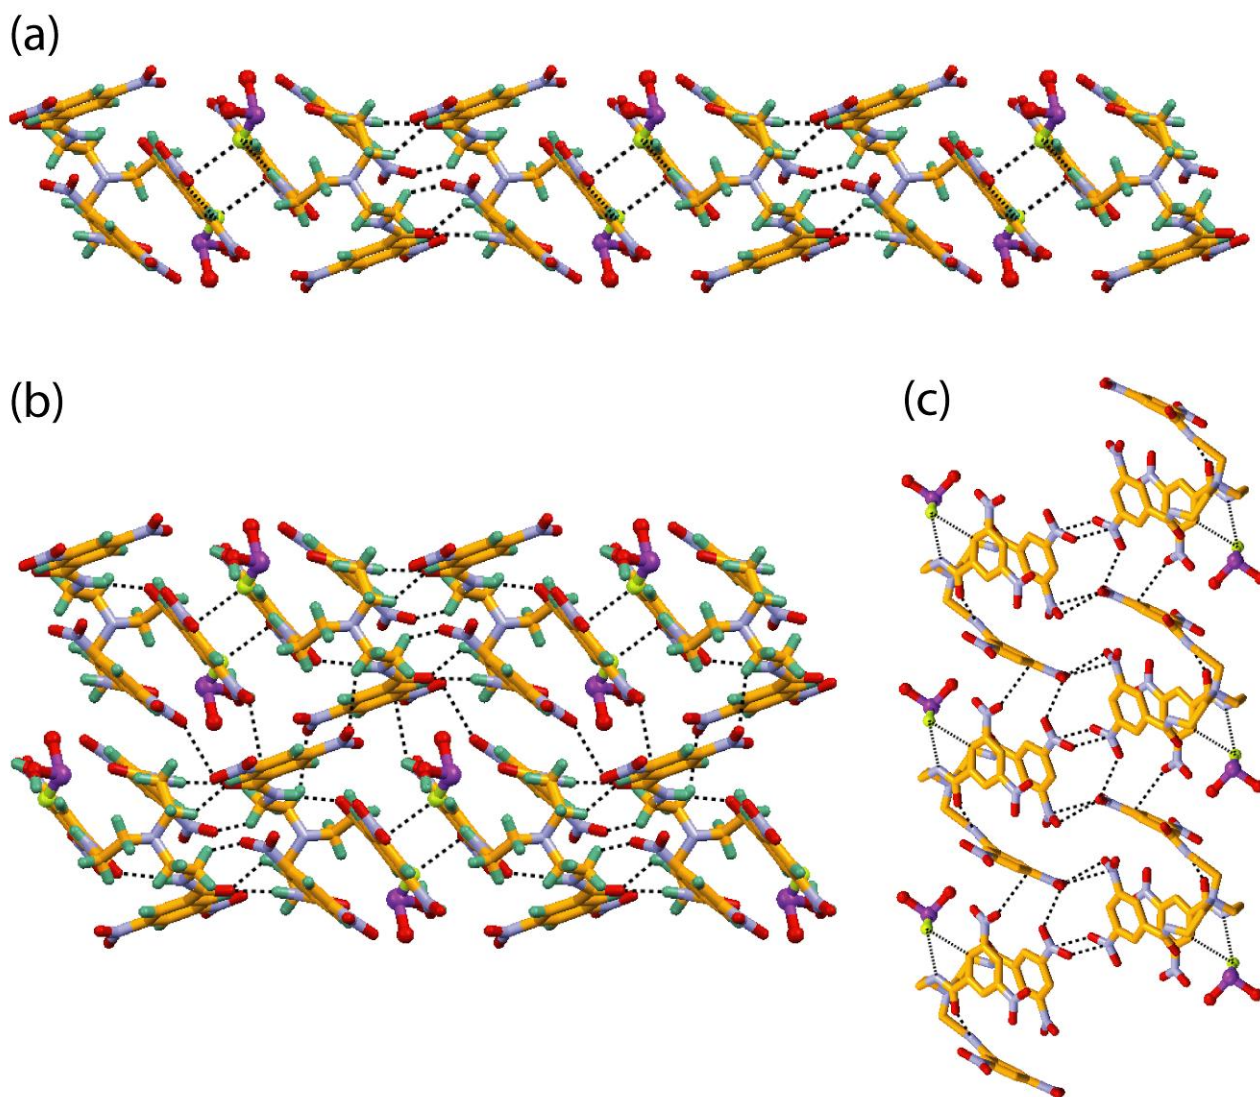

**Figure S11.** (a) H-bonded  $\text{KF}(\text{H}_2\text{O})_2$  bridged 1D chain of **L** in **2** diagonally along  $ac$ -axis. (b) Crystal packing of **2** as viewed down the  $a$ -axis showing the H-bonding and electron donor-acceptor interactions between two adjacent 1D chains of receptor molecules. (c) View of the  $n \rightarrow \pi^*$  ( $\text{O} \rightarrow \text{N/C}$ ) electron donor-acceptor interactions between the adjacent 1D chains.

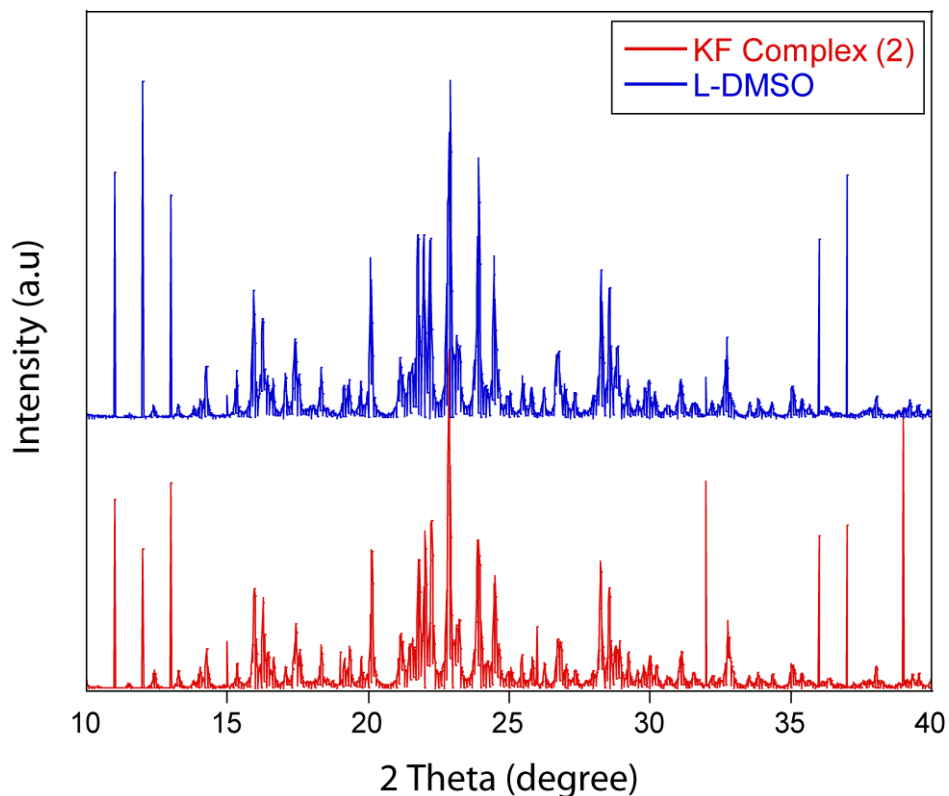

**Figure S12.** Simulated PXRD patterns of isostructural L-DMSO and KF complex (2).

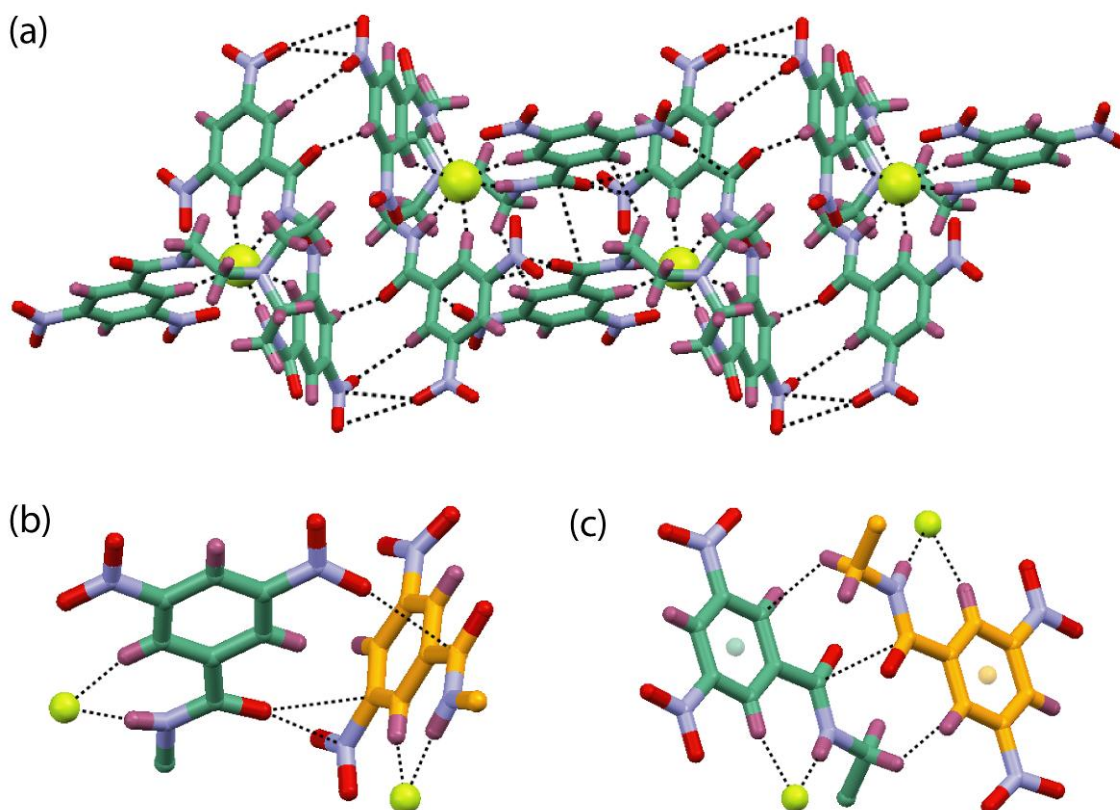

**Figure S13.** (a) H-bonding and electron donor-acceptor interactions ( $n \rightarrow \pi^*/n \rightarrow \pi^*(k)$  and  $\pi \rightarrow \pi^*$ ) between two  $F^-$  encapsulated receptor dimers. (b) Magnified view of the  $n \rightarrow \pi^*$  ( $O \rightarrow N/C$ ) interactions. (c) Magnified view of the aliphatic  $C-H \cdots \pi$  and  $\pi \rightarrow \pi^*$  ( $C \rightarrow C$ ) interactions.



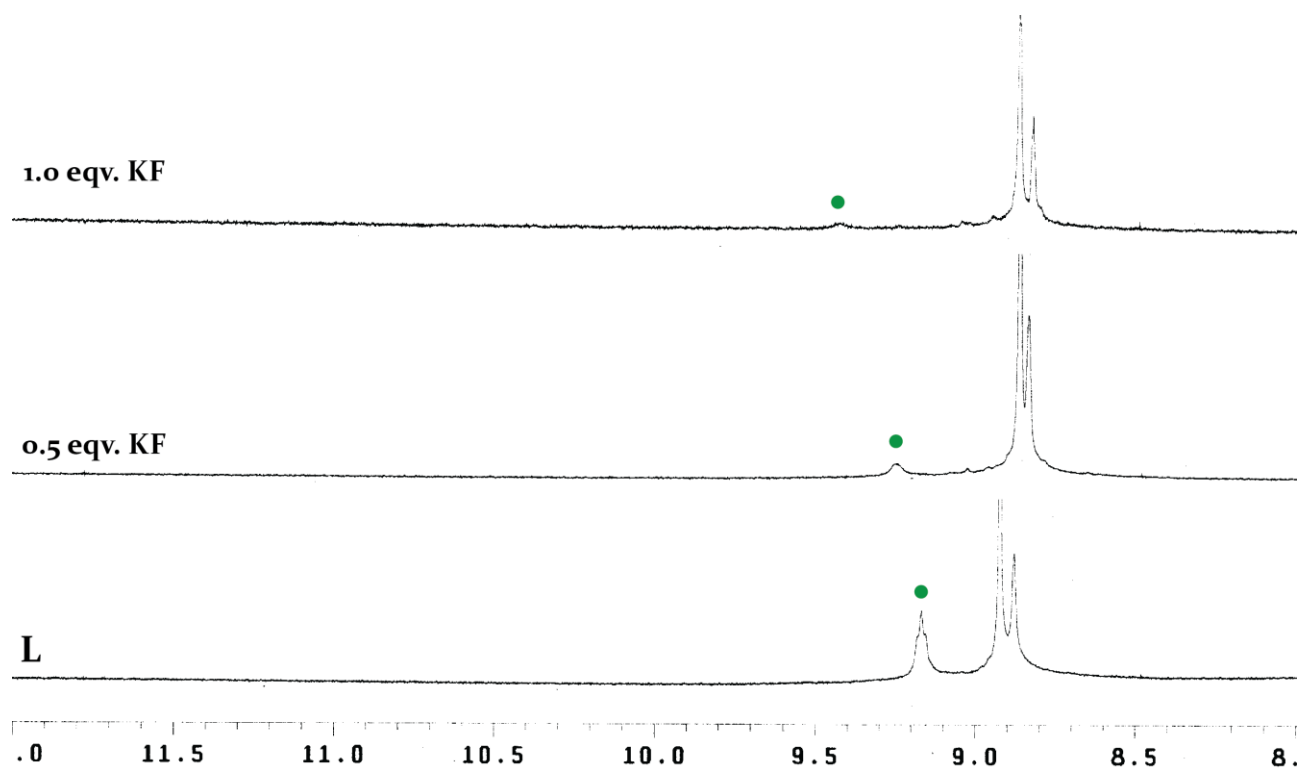

**Figure S14.**  $^1\text{H}$  NMR titration of L with KF in  $\text{DMSO-}d_6$  at 298 K, showing the downfield shift of amide  $-\text{NH}$  protons up to 1 equiv. of KF beyond which precipitation occurs.
